# Supplementary material for: Identification of the Proliferation/Differentiation Switch in the Cellular Network of Multicellular Organisms
Source: PubMed Central journal article supplement (PMC1664705; doi:10.1371/journal.pcbi.0020145), 2006-11-24

# Supplementary Figure 2

**A**

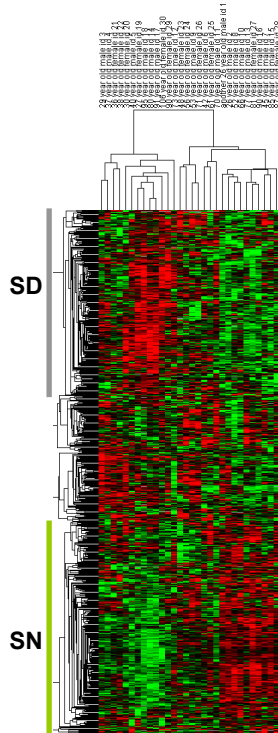

**B**

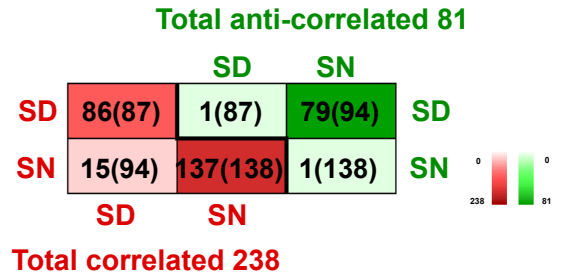

**C**

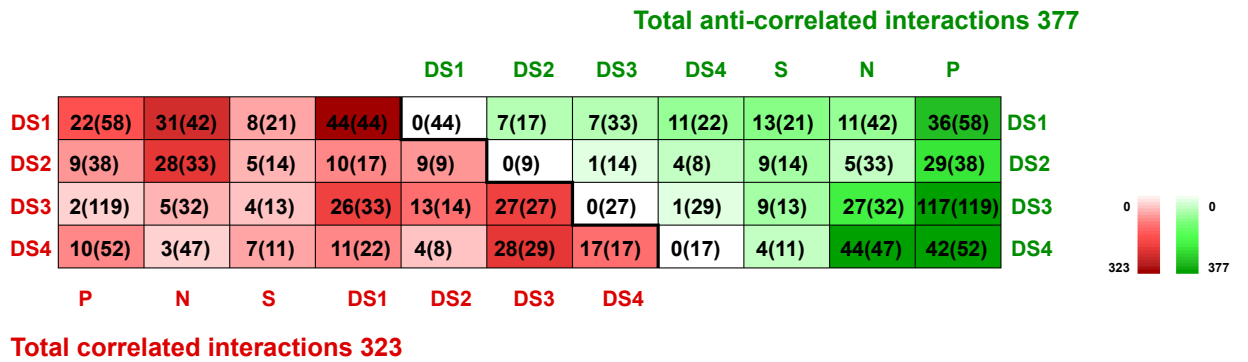

Supplement: pcbi.0020145.sg002.pdf [file pcbi.0020145.sg002.pdf]
