# Supplementary material for: Identification of the Proliferation/Differentiation Switch in the Cellular Network of Multicellular Organisms
Source: PubMed Central journal article supplement (PMC1664705; doi:10.1371/journal.pcbi.0020145), 2006-11-24

# Supplementary Figure 4

**A**

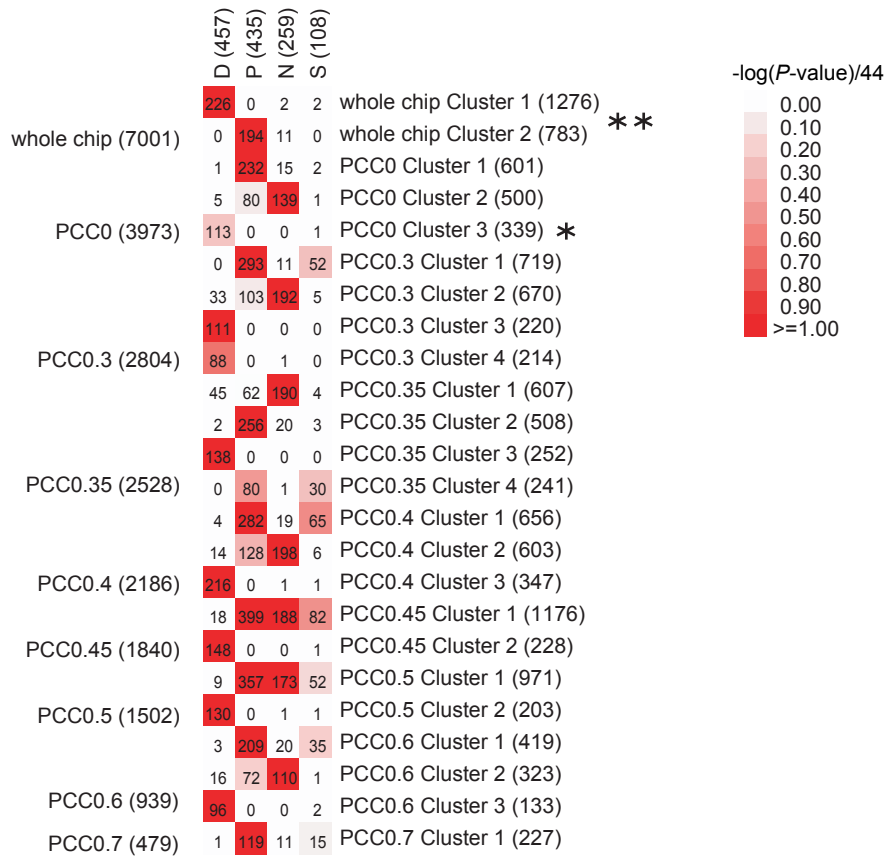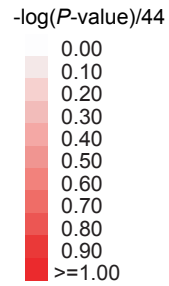

\* This cluster is merged by two smaller clusters because the number of cluster is less than 100.

\*\* These two clusters were manually extracted from the clustering dendrigraph of the whole gene in U95 genechip based on visual anti-correlation.

**B**

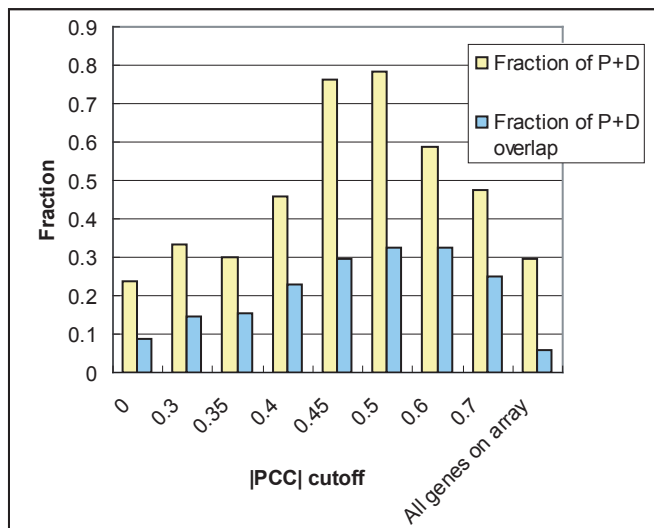

Supplement: pcbi.0020145.sg004.pdf [file pcbi.0020145.sg004.pdf]
