# Supplementary material for: Identification of the Proliferation/Differentiation Switch in the Cellular Network of Multicellular Organisms
Source: PLoS Comput Biol. 2006 Nov 24;2(11):e145. doi: 10.1371/journal.pcbi.0020145 (PMC1664705; doi:10.1371/journal.pcbi.0020145)
Supplement: Table S2 — (137 KB PDF) [file pcbi.0020145.st002.pdf]

## Supplementary Table 2

| Microarray dataset                                  | Negative control          | Positive control                | Reference                       |
|-----------------------------------------------------|---------------------------|---------------------------------|---------------------------------|
| HS endometrial stromal cell differentiation by cAMP | 0-2 hr                    | 12 hr                           | <a href="#">PMID: 14532334</a>  |
| MM myoblast differentiation                         | -2 to -1 day              | 2 to 10 day                     | <a href="#">PMID: 14688207</a>  |
| MM smooth muscle cell differentiation by RA         | untreated                 | RA treated                      | <a href="#">PMID: 15340120</a>  |
| RN chondrocyte differentiation by FGF1              | 0 hr                      | 1-24 hr                         | <a href="#">PMID: 12821644</a>  |
| DM neural progenitor cell differentiation           | cholinergic/Gad1 negative | neural differentiation positive | <a href="#">GEO ID: GSE1060</a> |
